# Supplementary material for: Evaluation of the antiepileptic activity of hesperidin by fluorescence imaging
Source: Royal Society of Chemistry journal article supplement (doi:10.1039/d4nj00801d), 2024-01-01
Supplement: d4nj00801d4.pdf [file d4nj00801d4.pdf]

*Supporting Information for*

**Evaluation of the antiepileptic activity of hesperidin by  
fluorescence imaging**

Yan Yin, Wenhui Song, Yinhu Ai, Weiyong Lin\*

*Institute of Optical Materials and Chemical Biology, Guangxi Key Laboratory of  
Electrochemical Energy Materials, School of Chemistry and Chemical Engineering,  
Guangxi University, Nanning, Guangxi 530004, P. R. China*

\*Corresponding Author. E-mail address: [weiyonglin2013@163.com](mailto:weiyonglin2013@163.com).

## Contents

|                                                         |     |
|---------------------------------------------------------|-----|
| Materials and instruments .....                         | S3  |
| The synthesis route of YCN .....                        | S3  |
| Preparation of Solutions of probe YCN and Analytes..... | S4  |
| Calculation of fluorescence quantum yield of YCN.....   | S4  |
| The Förster-Hoffmann equation .....                     | S4  |
| Cytotoxicity assay.....                                 | S4  |
| Cells culture .....                                     | S5  |
| Co-localization Experiment .....                        | S5  |
| Fluorescence imaging in live HeLa cells.....            | S5  |
| Table S1 .....                                          | S7  |
| Table S2 .....                                          | S8  |
| Figure S1.....                                          | S9  |
| Figure S2.....                                          | S10 |
| Figure S3.....                                          | S10 |
| Figure S4.....                                          | S11 |
| Figure S5.....                                          | S11 |
| Figure S6.....                                          | S12 |
| References.....                                         | S13 |

## Materials and instruments

The reagents used in this experiment were commercially available and had not been subjected to any further treatment. TLC analysis was performed on silica gel plates and column chromatography was conducted over silica gel (mesh 200-300), both of which were obtained from the Qingdao Ocean Chemicals. The UV-Vis spectra were obtained by a UV-2700 spectrophotometer (Shimadzu, Japan). In addition, all fluorescence spectrum was tested at the room temperature using an F-4600 fluorescence spectrophotometer (Japan Hitachi). High resolution mass spectra were acquired on Agilent 7250& JEOL-JMS-T100LP AccuTOF (Bruker Daltonics, Billerica, MA, USA). And liquid chromatography-mass spectrometry (LC-MS) data were measured with an Agilent 6510 Q-TOF LC / MS (Agilent, USA).  $^1\text{H}$  and  $^{13}\text{C}$  NMR spectra were recorded on a Bruker AVANCE III 400 MHz digital nuclear magnetic resonance spectrometer (Bruker Biospin, Billerica, MA, USA) with an internal standard of tetramethylsilane (TMS). The fluorescence imaging of cells was performed with a Leica TCS SP8 CARS confocal microscope.

## The synthesis route of YCN

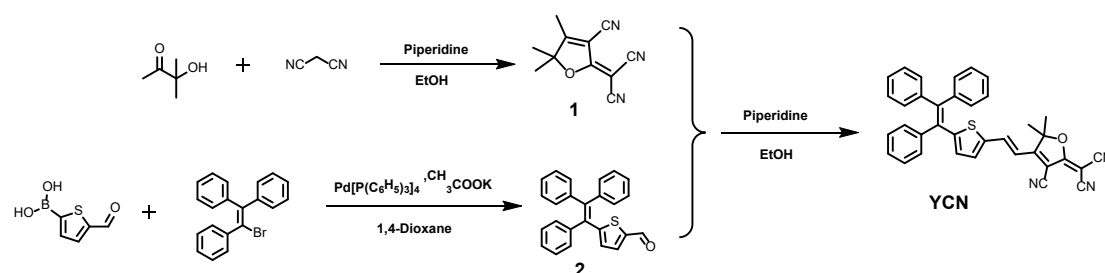

**Scheme S1** The synthesis route of YCN.

**Compound 1** was synthesized from existing literature<sup>1</sup>. 3-hydroxy-3-methyl-2-butanone (1.75 g, 15.98 mmol), propylene (2.58 g, 39.17 mmol) and sodium ethanol (0.2 g, 2.94 mmol) were dissolved in 20 mL of ethanol and stirred at 80 °C for 2 hours. Then, the solvent was depressurized and evaporated and added to cold ethanol to precipitate white solids under ice bath conditions.

5-aldehyde-2 thiopheneboronic acid (600 mg, 4 mmol), bromostilbene (1.34 g, 4 mmol), tetratriphenylphosphine) palladium (92 mg, 0.08 mmol) and potassium acetate (1.56 g, 16 mmol) were dissolved in 1,4-dioxane and stirred at 90°C for 12 hours under nitrogen conditions. Next, the solvent was spun dry under reduced pressure and the coarse product was purified by silica gel column chromatography (the volume ratio of petroleum ether and ethyl acetate was 10:1) to obtain **compound 2** (Yield: 50%).  $^1\text{H}$  NMR (600 MHz, Chloroform-*d*)  $\delta$  9.73 (s, 1H), 7.41 (d,  $J = 3.9$  Hz, 1H), 7.26 (dd,  $J = 4.9, 1.9$  Hz, 3H), 7.20 (dd,  $J = 6.5, 3.0$  Hz, 2H), 7.18 – 7.15 (m, 3H), 7.15 – 7.12 (m, 2H), 7.08 – 7.06 (m, 3H), 6.98 (dt,  $J = 7.3, 3.6$  Hz, 2H), 6.64 (d,  $J =$

4.0 Hz, 1H). <sup>13</sup>C NMR (151 MHz, Chloroform-*d*) δ 182.83, 156.98, 144.74, 142.88, 142.64, 142.35, 142.22, 135.59, 133.14, 131.74, 131.33, 131.16, 130.88, 130.67, 130.58, 130.48, 130.03, 129.23, 128.55, 128.09, 128.06, 127.92, 127.86, 127.70, 127.47, 127.08.

### **Preparation of Solutions of probe YCN and Analytes**

The solvents with different viscosity were obtained by mixing methanol-glycerol systems with different proportions. Viscosity value was measured by the NDJ-8S rotary viscometer. The test solutions of YCN (10 μM) with different viscosity were prepared by adding the stock solution (10 mM) 2 μL to 2 mL of solvent mixture (methanol-glycerol solvent systems). After standing for 1 hour at a constant temperature, the solutions were measured to obtain the UV-vis and fluorescence spectra.

### **Calculation of fluorescence quantum yield of YCN**

The fluorescence quantum yields of YCN were evaluated by using Rhodamine B as a reference standard. The fluorescence quantum yield Φ<sub>s</sub> is calculated by the formula as follow:

$$\Phi_u = \Phi_s \frac{F_u A_s}{F_s A_u} \left( \frac{n_u}{n_s} \right)^2$$

Where Φ<sub>s</sub> is the quantum yield of the sample, F is the area integral value of the corrected fluorescence spectrum, and A and n represent the absorbance and the refractive index of the solvent, respectively. The subscript “u” stands for the unknown to be tested and “s” is the standard.

### **The Förster-Hoffmann equation**

The relationship between the fluorescence emission intensity of the probe YCN and the solvent viscosity could be formulated by the Förster-Hoffmann equation:

$$\log I = C + x \log \eta$$

Where η is the viscosity, I is the emission intensity, C is a constant, and x is the sensitivity of the probe to viscosity.

### **Cytotoxicity assay**

In vitro cytotoxicity was measured using the colorimetric methyl thiazolyl tetrazolium (MTT) assay on HeLa and SH-SY5Y cells. About 2×10<sup>4</sup> cells/mL HeLa or SH-SY5Y cells were incubated with various concentrations of YCN (0-50 μM) in 96-well plates for 24 h. Subsequent work was that 10 μL MTT (5 mg/mL) was added to each well and continued to incubate for another 4 h. In the end, the media was

discharged, and 100  $\mu$ L of DMSO was loaded to dissolve the formazan crystals. The plate was shaken for about 10 min, and each well was analyzed by the microplate reader and detected at the absorbance of 490 nm.

$$\text{Cell viability} = \frac{\text{OD}_{\text{sample}} - \text{OD}_{\text{blank}}}{\text{OD}_{\text{control}} - \text{OD}_{\text{blank}}} \times 100\%$$

## Cells culture

HeLa, SH-SY5Y and BV-2 cells were cultured in 90% Dulbecco's Modified Eagle Medium (DMEM, Gibico) supplemented with 10% FBS (Hyclone) and 1% antibiotics in an atmosphere of 37 °C and 5% CO<sub>2</sub>. The cultured HeLa, SH-SY5Y and BV-2 cells were seeded into glass culture dishes and cultured to 4 $\times$ 10<sup>5</sup> cells/mL to fluorescence imaging.

HT-22 cells were cultured in RPMI 1640 containing 10% FBS (fetal calf serum) in the air with 5% CO<sub>2</sub> at 37 °C. The cultured HT-22 cells were seeded into glass culture dishes and cultured to 4 $\times$ 10<sup>5</sup> cells/mL to fluorescence imaging.

## Co-localization Experiment

The HeLa cells were seeded into glass bottom dishes with appropriate density. After 24 h, the cells were treated with 10  $\mu$ M YCN for 30 min, and then treated with 10  $\mu$ M **BODIPY 493/503** for another 10 min. Fluorescence images were acquired with a Leica TCS SP8 CARS confocal microscope.

## Fluorescence imaging in live HeLa cells

(1) HeLa cells were cultured as above. The cultured DMEM cells were seeded into glass culture dishes and cultured to 4 $\times$ 10<sup>5</sup> cells/mL to fluorescence imaging. After 24 hours, the original medium in the dish were washed, then the first group HeLa cells was incubation with YCN only. The second and third group was treated with 200  $\mu$ M Honokiol for 30 min or 100  $\mu$ M Plumbagin for 30 min and then 10  $\mu$ M YCN was added for extra 30 min, respectively. Besides, the fourth group were cultivated with 200  $\mu$ M hesperidin for 30 min, and then 10  $\mu$ M YCN was added for supererogatory 30 min. Last, the last group was treated with 200  $\mu$ M Honokiol and 200  $\mu$ M rapamycin for 30 min and then 10  $\mu$ M YCN was added for additional 30 min. After that, confocal imaging was carried out on Leica TCS SP8 CARS confocal microscope.

(2) HeLa cells were cultured as above. The cultured DMEM cells were seeded into glass culture dishes and cultured to 4 $\times$ 10<sup>5</sup> cells/mL to fluorescence imaging. After 24 hours, the original medium in the dish were washed, and then the cell was

cultured with 10  $\mu\text{M}$  YCN for 30 min. Next, 200  $\mu\text{M}$  Honokiol was added to the cells to image for 120 min.

(3) SH-SY5Y cells were cultured as above. The cultured DMEM cells were seeded into glass culture dishes and cultured to  $4 \times 10^5$  cells/mL to fluorescence imaging. After 24 hours, the original medium in the dish were washed, then the first group SH-SY5Y cells was incubation with YCN only. The second group was cultivated with 25  $\mu\text{M}$  Kainic acid (KA) for 30 min, and next 10  $\mu\text{M}$  YCN was supplied in the cell for another 30 min. The third and last group was trained with 50  $\mu\text{M}$  or 100 $\mu\text{M}$  KA for 30 min, and next 10  $\mu\text{M}$  YCN was added to the cell for another 30 min. After that, confocal imaging was carried out on Leica TCS SP8 CARS confocal microscope.

(4) SH-SY5Y, HT-22 and BV-2 cells culture as above. Then the cell was washed three times with sterile PBS buffer (pH 7.4) and incubated with 10  $\mu\text{M}$  YCN for 30 min. After treatment, the cells were imaged *in situ* every 20 seconds (SH-SY5Y and BV-2) for 20 minutes or 30 seconds (HT-22) for 30 minutes.

(5) SH-SY5Y cells were cultured as described above. The cultured DMEM cells were seeded into glass culture dishes and cultured to  $4 \times 10^5$  cells/mL to fluorescence imaging. After 24 hours, the original medium in the dish were washed, then the first group SH-SY5Y cells was incubation with YCN only. The second group was cultivated with 10  $\mu\text{M}$  YCN for 30 min, and next 25  $\mu\text{M}$  Kainic acid (KA) was supplied in the cell for another 30 min. The third group was treated with 10  $\mu\text{M}$  YCN for 30 min, and next 25  $\mu\text{M}$  KA and 20  $\mu\text{M}$  hesperidin were supplied in the cell for another 30 min. The fourth group was disposed in 10  $\mu\text{M}$  YCN for 30 min, and then 25  $\mu\text{M}$  KA and 40  $\mu\text{M}$  hesperidin were treated in the cell for another 30 min. The fifth group was incubated with 10  $\mu\text{M}$  YCN for 30 min, and next 25  $\mu\text{M}$  KA and 60  $\mu\text{M}$  hesperidin were applied in the cell for 30 min. After that, confocal imaging was carried out on Leica TCS SP8 CARS confocal microscope.

**Table S1** Fluorescence quantum yield ( $\Phi$ ) of YCN in the methanol/glycerol mixtures with different viscosities ( $\eta$ /cp).

| Methanol/glycerol(v/v) | $\eta$ (cp) | Fluorescence quantum yield( $\Phi$ )/% |
|------------------------|-------------|----------------------------------------|
| 0:10                   | 937.48      | 14.39                                  |
| 1:9                    | 312.84      | 6.56                                   |
| 2:8                    | 111.36      | 2.99                                   |
| 3:7                    | 54.74       | 2.96                                   |
| 4:6                    | 34.84       | 0.94                                   |
| 5:5                    | 25.23       | 0.83                                   |
| 6:4                    | 14.57       | 0.53                                   |
| 7:3                    | 7.89        | 0.33                                   |
| 8:2                    | 3.3         | 0.25                                   |
| 9:1                    | 2.63        | 0.19                                   |
| 10:0                   | 1.29        | 0.16                                   |

**Table S2** The fluorescence intensity of 10  $\mu$ M YCN treated with various species and nature products in PBS (pH 7.4, 10 mM, 5% DMSO) and in glycerol at 715 nm.  $\lambda_{\text{ex}} = 561$  nm.

| <b>Selective fluorescence spectrum</b> |                      |                                 |                      |
|----------------------------------------|----------------------|---------------------------------|----------------------|
| Analytes                               | IF. Intensity (a.u.) | Analytes                        | IF. Intensity (a.u.) |
| Blank                                  | 29.85                | FeSO <sub>4</sub>               | 27.07                |
| Cys                                    | 29.54                | CaCl <sub>2</sub>               | 30.05                |
| Glucose                                | 29.03                | CoCl <sub>2</sub>               | 28.55                |
| GSH                                    | 28.93                | MgCl <sub>2</sub>               | 29.87                |
| L-Leucine                              | 25.73                | FeCl <sub>3</sub>               | 28.97                |
| L-Tryptophan                           | 29.78                | ZnCl <sub>2</sub>               | 30.52                |
| L-Aspartic acid                        | 27.58                | OH •                            | 37.91                |
| Isoleucine                             | 27.64                | H <sub>2</sub> O <sub>2</sub>   | 27.09                |
| TBHP                                   | 27.33                | Na <sub>2</sub> CO <sub>3</sub> | 28.28                |
| NaClO                                  | 27.62                | HgNO <sub>3</sub>               | 29.13                |
| NaF                                    | 29.3                 | NaBr                            | 28.45                |
| Glycine                                | 27.76                | Na <sub>2</sub> SO <sub>3</sub> | 26.92                |
| Na <sub>2</sub> S                      | 25.42                | NaNO <sub>2</sub>               | 28.49                |
| CuSO <sub>4</sub>                      | 27.99                | Honokiol                        | 17.27                |
| Hesperidin                             | 8.413                | Plumbagin                       | 11.24                |
| Glycerol                               | 440.4                | —                               | —                    |



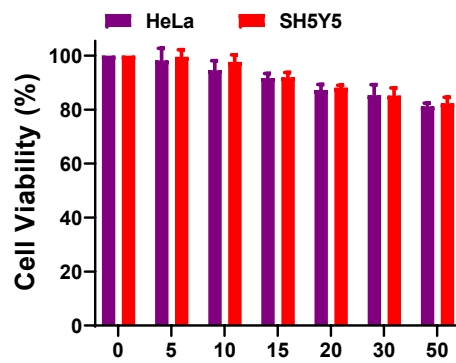

**Figure S1** MTT assays of YCN at different concentrations for HeLa and SH-SY5Y.

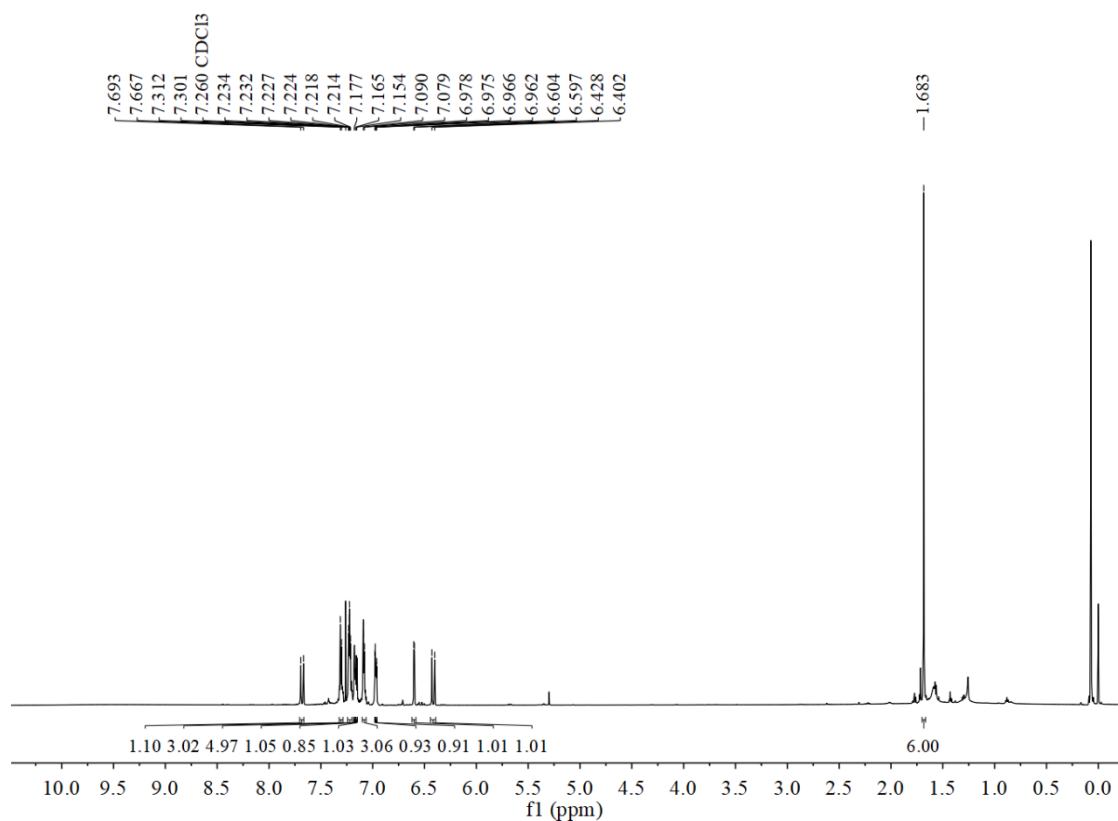

**Figure S2** <sup>1</sup>H NMR data of YCN (Chloroform-*d*).

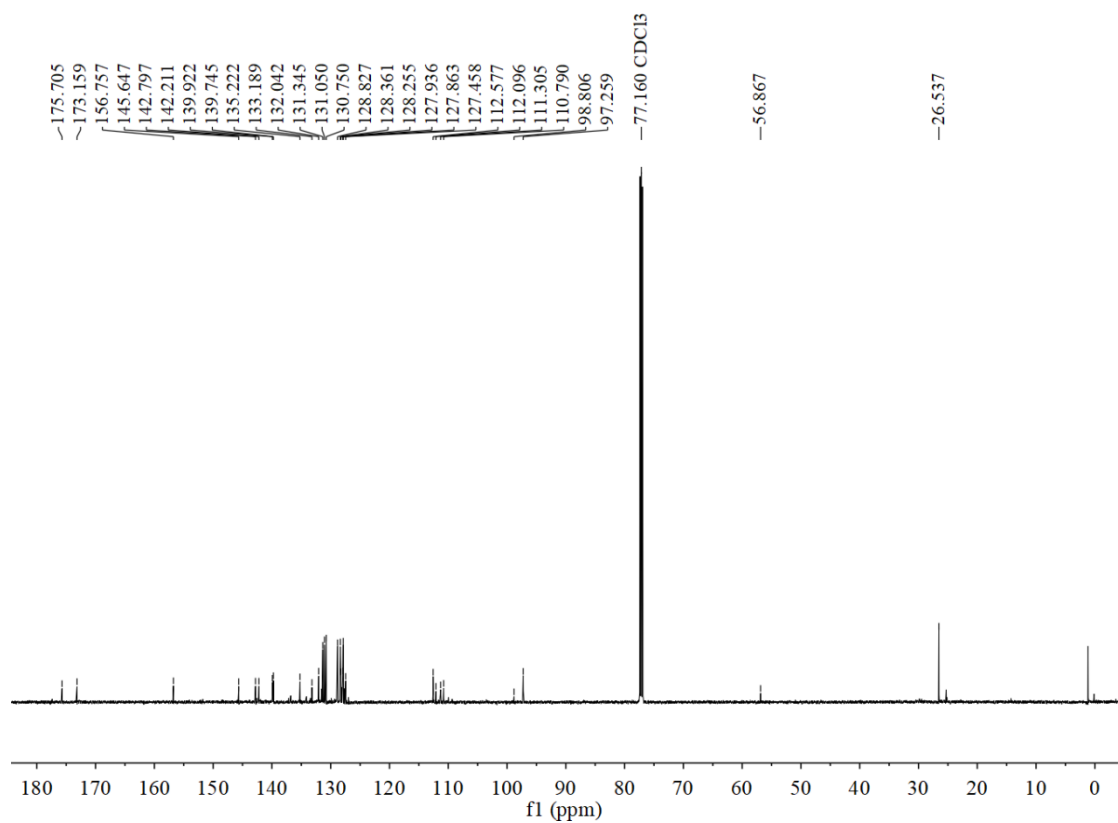

**Figure S3** <sup>13</sup>C NMR data of YCN (Chloroform-*d*).

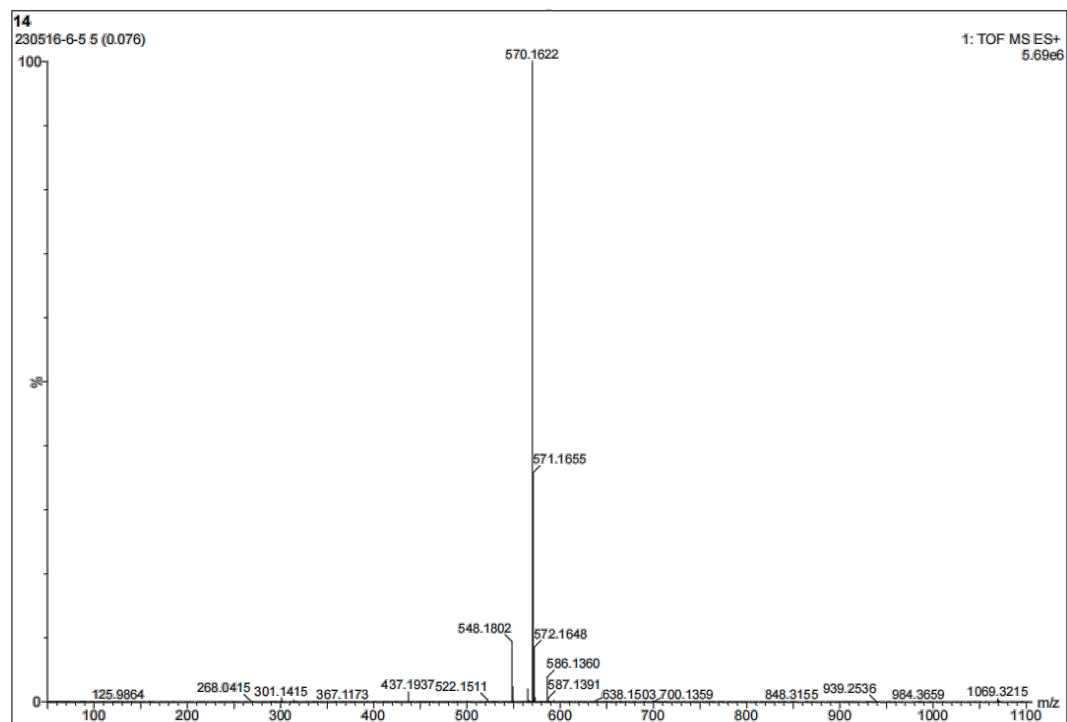

**Figure S4** HRMS spectrum of probe YCN.

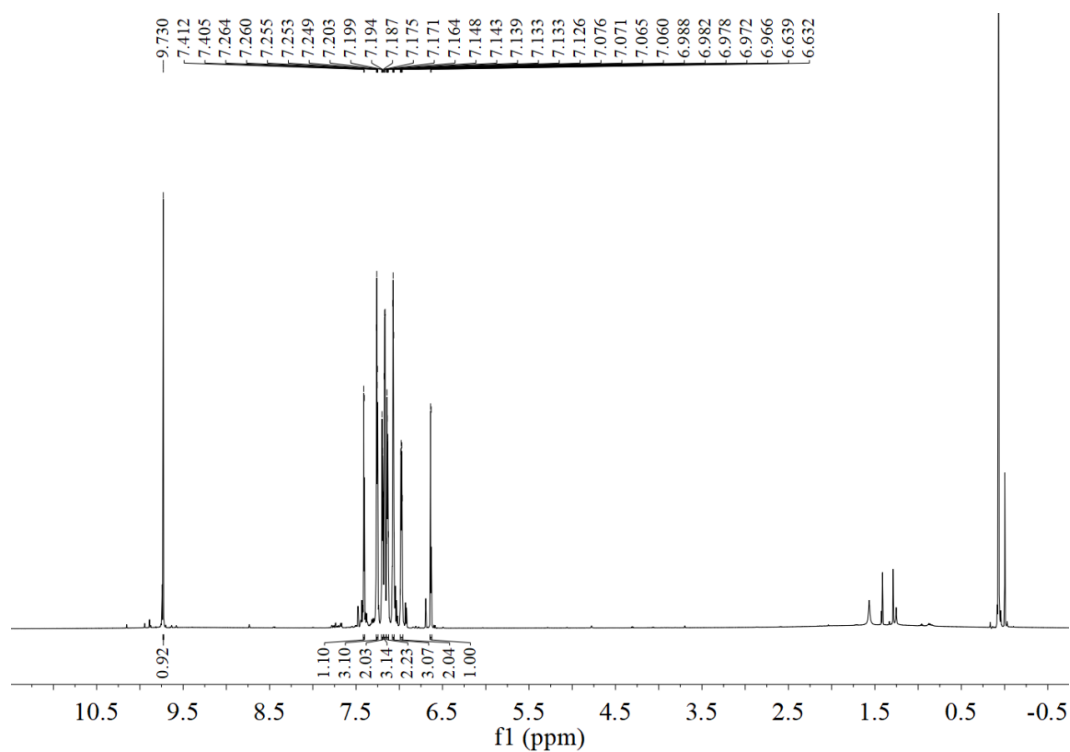

**Figure S5**  $^1\text{H}$  NMR data of compound **2** (Chloroform-*d*).

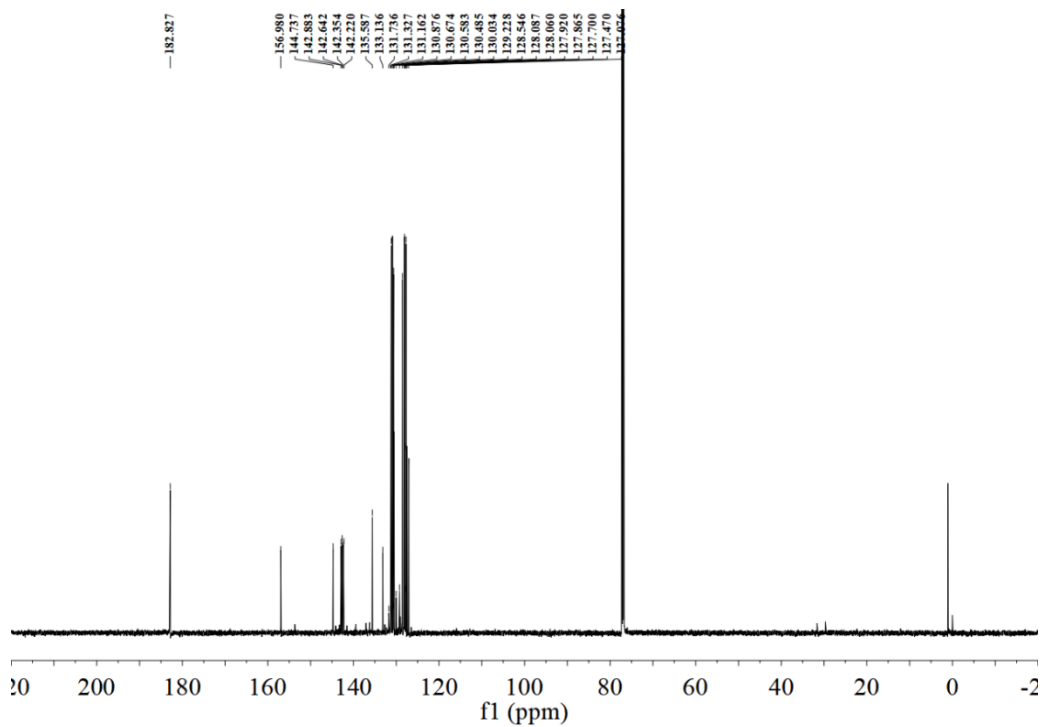

**Figure S6**  $^{13}\text{C}$  NMR data of **compound 2** (Chloroform-*d*).

## References

1. T. T. Niu, T. Yu, G. X. Yin, H. M. Chen, P. Yin and H. T. Li, *Analyst*, 2019, **144**, 1546-1554.
